# Supplementary material
Source: HighWire-hosted journal article supplement (https://bmjopenquality.bmj.com/highwire/filestream/136188/field_highwire_adjunct_files/0/ds1812.xlsx)
Supplement: ds1812.xlsx [file ds1812.xlsx]

## Sheet: Sheet1
Date: 26.04.13
	Number	Drug Chart	Gentamicin	Warfarin		IV fluids	Ceiling Care	DNAR	EDN	Bloods
		2 days clear?	Is is dosed over WE	Loading	NOt loading	Clear plan?	Documented?	signed?	completed?	If in plan, are they
			or is box filled in?	Bloods out,on WE list?	Dosed over WE?					in box,on WE list?
	1	Unoccupied	Unoccupied	Unoccupied	Unoccupied	Unoccupied	Unoccupied	Unoccupied	Unoccupied	Unoccupied
	2						NO
	3						NO		YES
	4	Unoccupied	Unoccupied	Unoccupied	Unoccupied	Unoccupied	Unoccupied	Unoccupied	Unoccupied	Unoccupied
	5						YES	YES
	6					NO	NO
	7						NO		NO
	8						NO		NO
	9						NO		NO
	10						NO
	11						NO
	12	Unoccupied	Unoccupied	Unoccupied	Unoccupied	Unoccupied	Unoccupied	Unoccupied	Unoccupied	Unoccupied
	13		NO				YES	YES	NO	NO
	14						NO		YES	NO
	15						NO		YES
	16						NO		YES
	17	Unoccupied	Unoccupied	Unoccupied	Unoccupied	Unoccupied	Unoccupied	Unoccupied	Unoccupied	Unoccupied
	18	NO				NO	NO			NO
	19	NO					NO
	20						NO
	21					NO	NO			NO
	22						NO		NO
	23	NO				NO	NO
	24						NO			NO
	25	Unoccupied	Unoccupied	Unoccupied	Unoccupied	Unoccupied	Unoccupied	Unoccupied	Unoccupied	Unoccupied
	26						NO		YES	NO
	27					NO	NO		NO
	28
Totals		23 Patients	1	0	0	5	2		11	6
